# Supplementary material for: Extracellular Vesicles Derived from Ovarian Cancer Cells Promote Tumor Progression through M2 Macrophage Polarization and Enhanced Angiogenesis
Source: Research Square preprint supplement (doi:10.21203/rs.3.rs-6834403/v1), 2025-07-14

**uncropped blots of Figure3C： Western blot analysis of EV markers in SKOV3-EVs (left) and HO8910-EVs (right)**


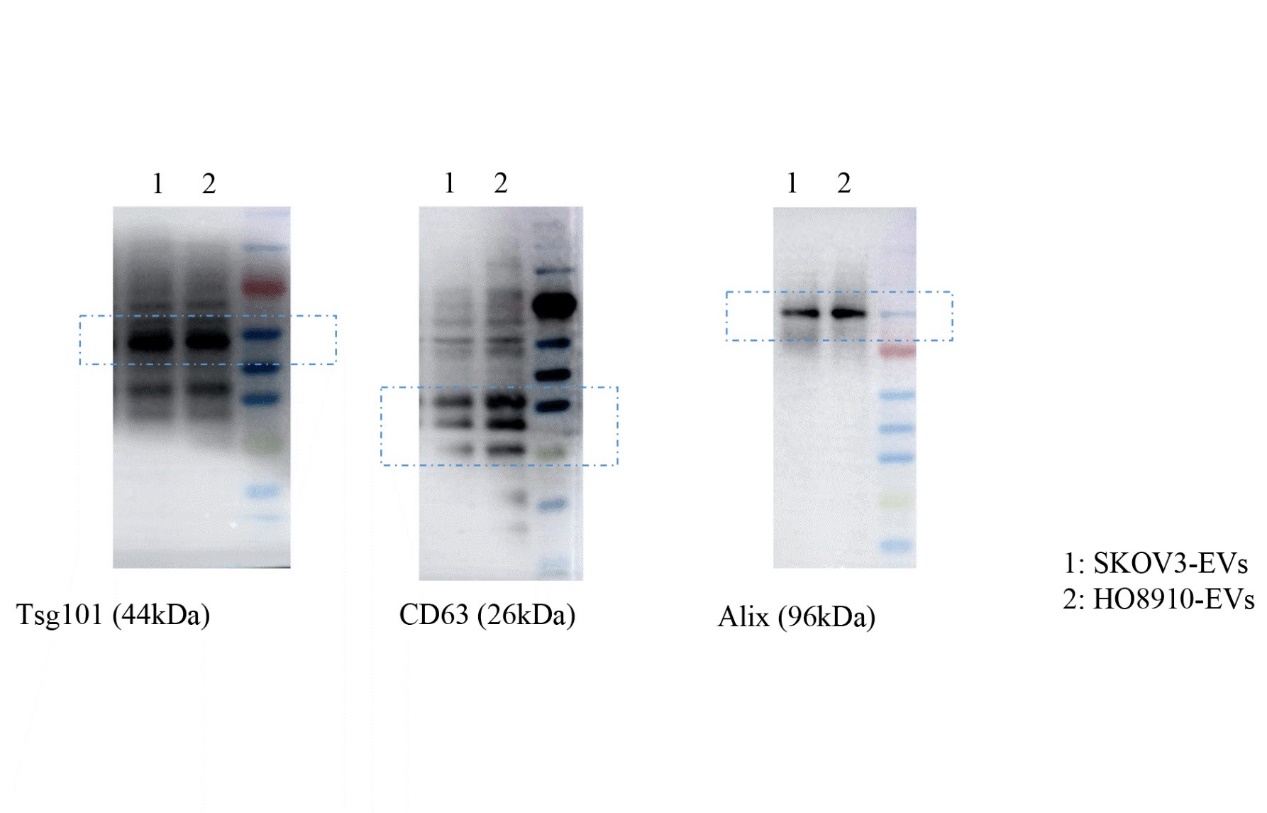


**uncropped blots of figure5E：Western blot of VEGFR expression in HUVECs co-cultured with differently pre-treated macrophages.**


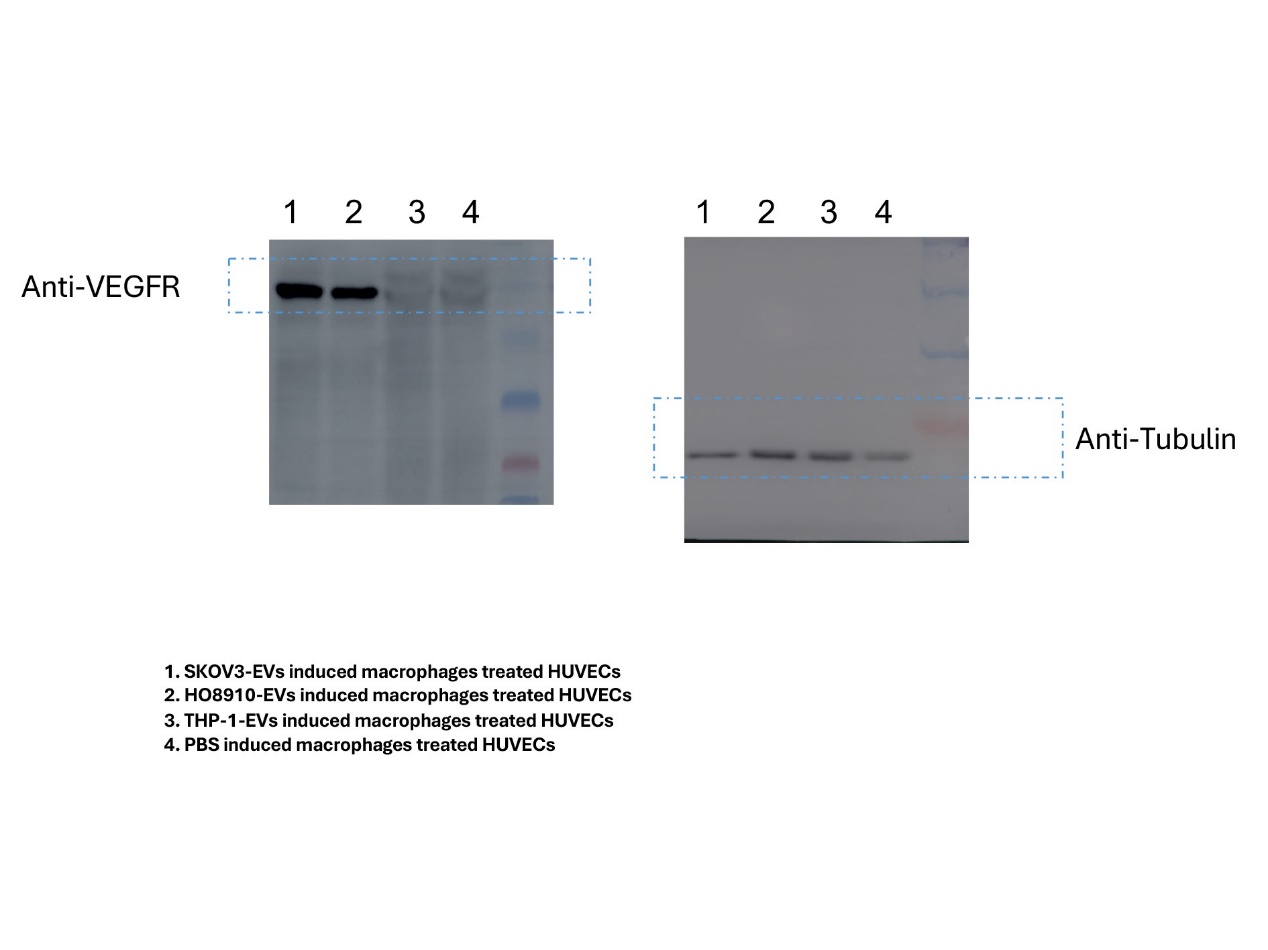

Supplement: Supplementary file 1 [file e72ecb78c5346c634175e4ba.docx]
